# Supplementary material for: Role of subnetworks mediated by TNFα, IL-23/IL-17 and IL-15 in a network involved in the pathogenesis of psoriasis
Source: PubMed Central journal article supplement (PMC7838322; doi:10.1038/s41598-020-80507-7), 2021-01-26
Supplement: 41598_2020_80507_MOESM1_ESM.pdf [file 41598_2020_80507_MOESM1_ESM.pdf]

# Role of subnetworks mediated by $TNF_{\alpha}$ , IL-23/IL-17 and IL-15 in a network involved in the pathogenesis of psoriasis

Rakesh Pandey<sup>1,+\*</sup>, Yusur Al-Nuaimi<sup>2</sup>, Rajiv Kumar Mishra<sup>3,++</sup>, Sarah K. Spurgeon<sup>4</sup>, and Marc Goodfellow<sup>1,5,6,7\*</sup>

<sup>1</sup>College of Engineering, Mathematics and Physical Sciences, University of Exeter, Exeter, UK

<sup>2</sup>Department of Dermatology, Royal Devon and Exeter Hospital, Exeter, UK

<sup>3</sup>Institute of Science and Technology Austria, Am Campus 1, Klosterneuburg, Austria

<sup>4</sup>Department of Electronic and Electrical Engineering, University College London, London, UK

<sup>5</sup>Living Systems Institute, University of Exeter, Exeter, UK

<sup>6</sup>Wellcome Trust Centre for Biomedical Modelling and Analysis, University of Exeter, Exeter, UK

<sup>7</sup>EPSRC Centre for Predictive Modelling in Healthcare, University of Exeter, Exeter, UK

\*rakeshpandey@bhu.ac.in and M.Goodfellow@exeter.ac.uk

+Present address: Bioinformatics Section, Mahila Mahavidyalay, Banaras Hindu University, Varanasi, India

++Present address: Premas Biotech Private Ltd. Manesar, Gurugram, India

## ABSTRACT

1 Figure S1

2 Figure S2

3 Figure S3

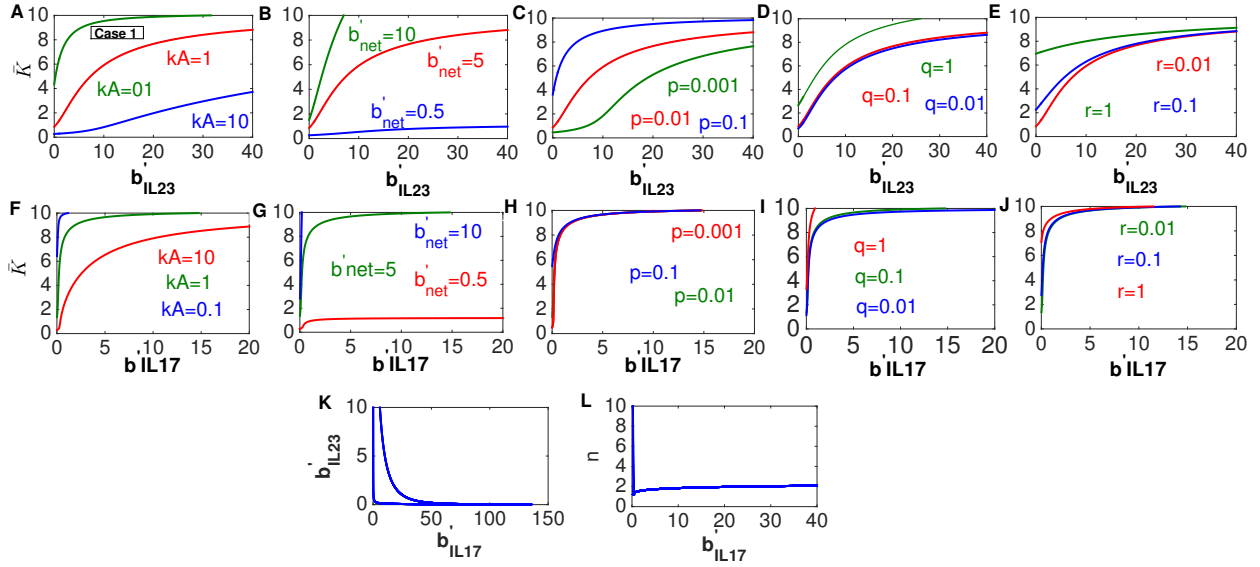

**Figure S1.** Signal response curves for the subnetwork formed by IL-23 and IL-17 for Case 1. Effects of changes in model parameters on the population of keratinocytes are displayed. Here, the combined level of IL-23 and IL-17 is represented by  $b_{net}$ . The default parameters are:  $b'_{IL23} = 1$ ,  $b'_{IL17} = 0.01$ ,  $b_{net} = 5$ ,  $p = 0.01 \text{ day}^{-1}$ ,  $q = 0.1 \text{ day}^{-1}$ ,  $r = 0.01$ ,  $n = 1$ ,  $\mu_L = 0.5 \text{ day}^{-1}$ ,  $\mu_K = 0.5 \text{ day}^{-1}$ ,  $\mu_D = 0.2 \text{ day}^{-1}$ , and  $k_A = 1$ . The initial condition is  $\bar{L} = \bar{D} = 2$  and  $\bar{K} = 4$

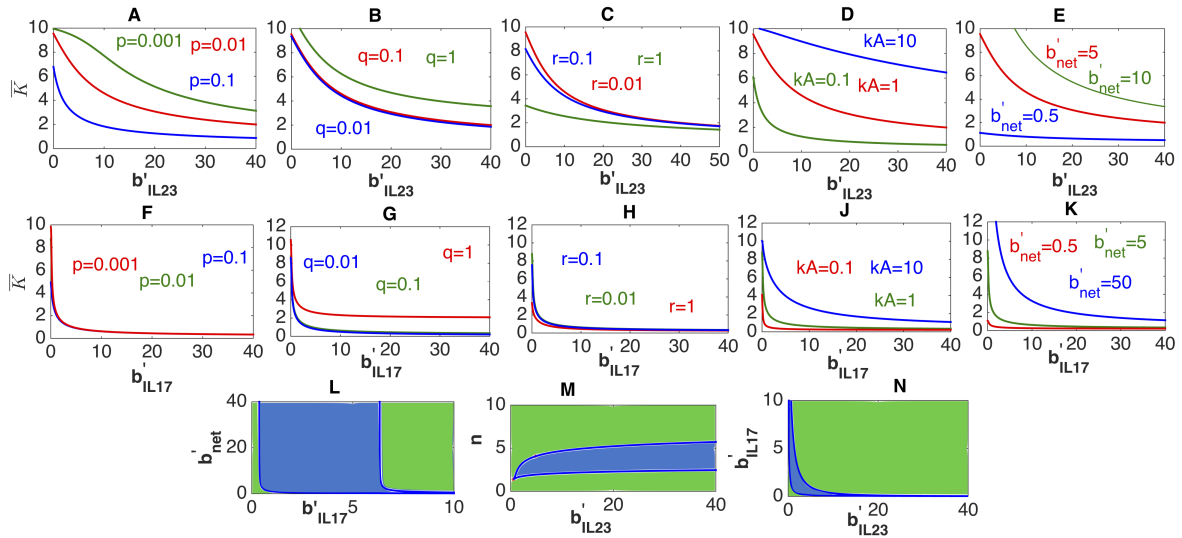

**Figure S2.** Signal response curves for the subnetwork formed by IL-23 and IL-17 for Case 2. Parameters are same as in Figure S1.

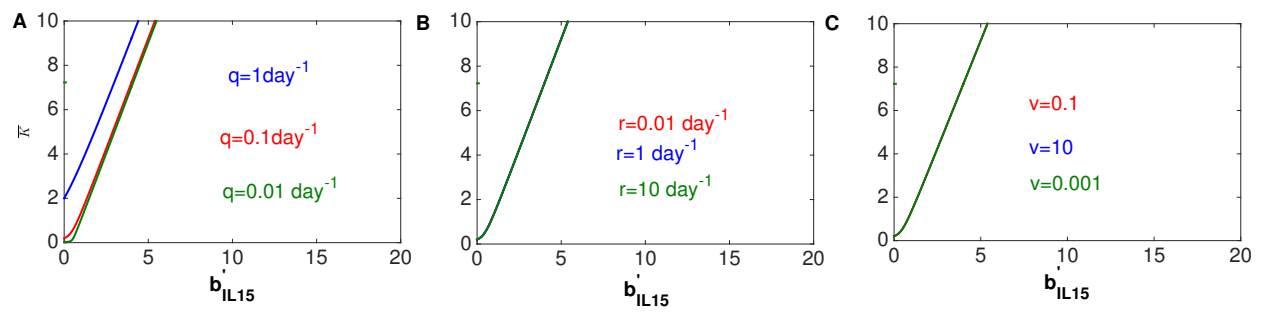

**Figure S3.** Signal response curves for the subnetwork formed by IL-15. The model parameters used here are same as in Figure 5.
